# Supplementary material for: Evaluating the Impact of Explosive Volcanic Eruptions on a Groundwater-Fed Water Supply System: An Exploratory Study in Ponta Delgada, São Miguel (Azores, Portugal)
Source: MDPI journal article supplement (doi:10.3390/w14071022), 2022-03-23
Supplement: s1 [file s1]

Archive with 1 entries (1 files):
- water-1614857-SI.pdf
