# Supplementary figures and images for: Evaluating the Impact of Explosive Volcanic Eruptions on a Groundwater-Fed Water Supply System: An Exploratory Study in Ponta Delgada, São Miguel (Azores, Portugal)
Source: MDPI journal article supplement (doi:10.3390/w14071022), 2022-03-23

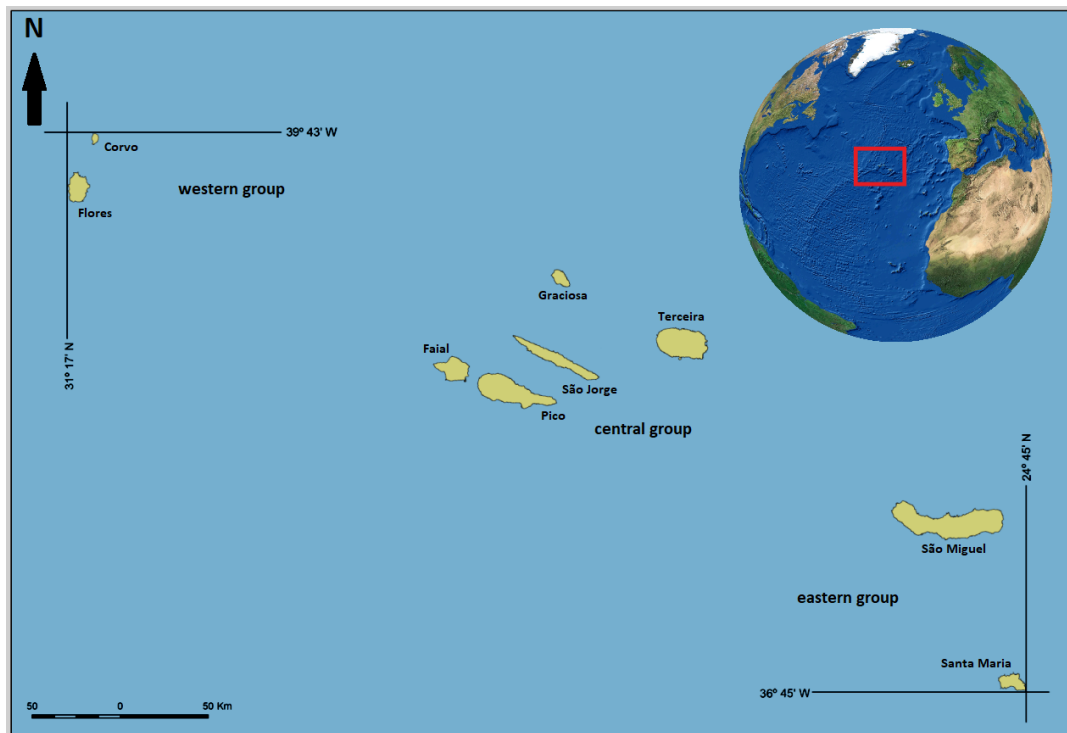

Figure S1: Location of the Azores archipelago in the North Atlantic Ocean.

Supplement: s1 [file s1 › water-1614857-SI.pdf]
